# Supplementary material for: Curcumin protects rat hippocampal neurons against pseudorabies virus by regulating the BDNF/TrkB pathway
Source: PubMed Central journal article supplement (PMC7746732; doi:10.1038/s41598-020-78903-0), 2020-12-17
Supplement: 41598_2020_78903_MOESM1_ESM.pdf [file 41598_2020_78903_MOESM1_ESM.pdf]

**Curcumin protects rat hippocampal neurons against pseudorabies virus by regulating the BDNF/TrkB pathway**

Bingjie YANG<sup>1</sup>, Guodong LUO<sup>1</sup>, Chen ZHANG<sup>1</sup>, Luqiu FENG<sup>1</sup>, Xianmei LUO<sup>1</sup>,  
Ling GAN<sup>\*1,2</sup>

<sup>1</sup>College of Animal Science, Southwest University, Rongchang, Chongqing  
402460, China

<sup>2</sup>Immunology research center, Medical Research Institute, Southwest University,  
Chongqing, 402460, China

\*Corresponding author: Ling GAN. Email: gl9089@swu.edu.cn; Full  
telephone: +8613983416663; Fax numbers: +86-02346751732

Supplementary figure 1

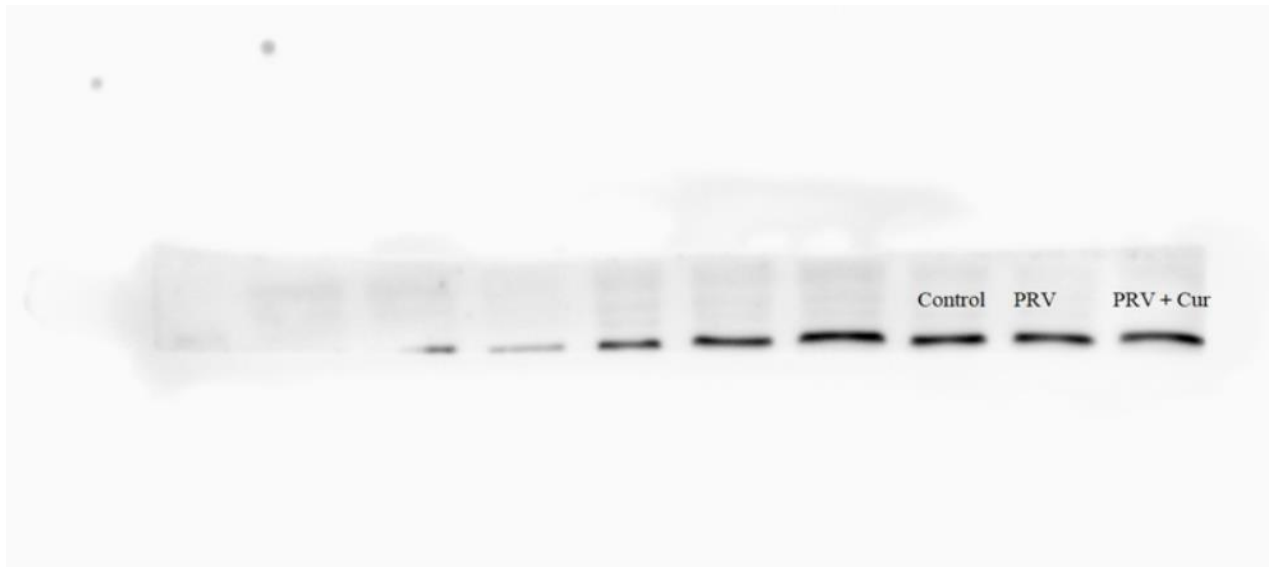

Supplementary figure 2

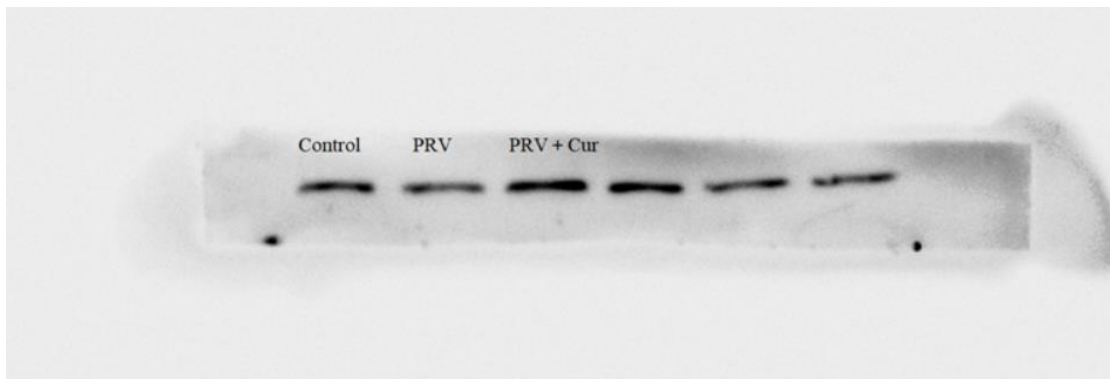

Supplementary figure 3

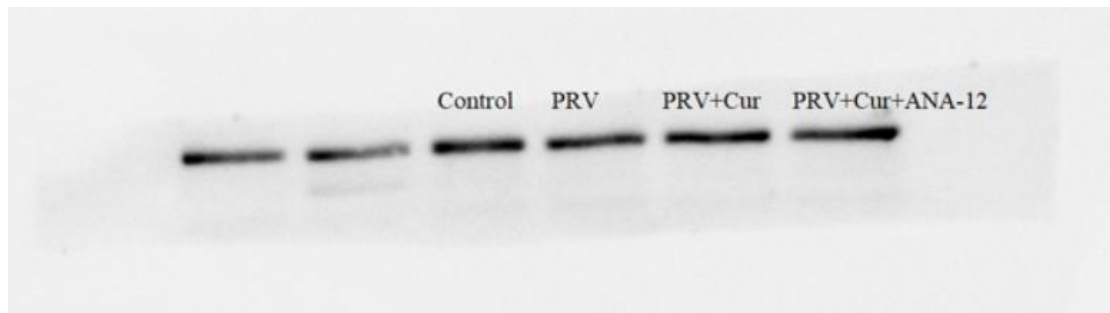

Supplementary figure 4

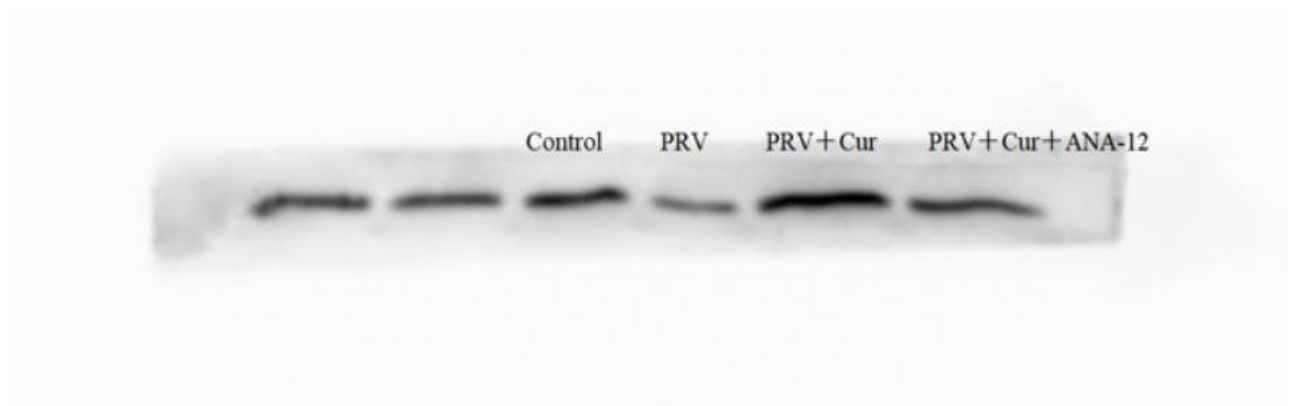

Supplementary figure 5

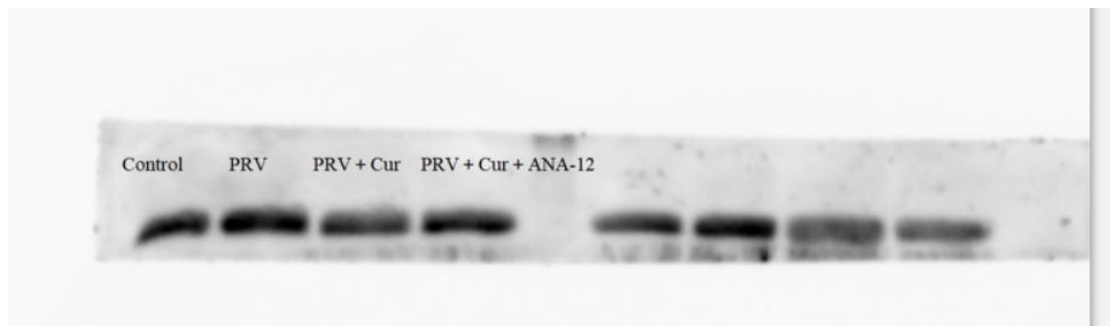

Supplementary figure 6

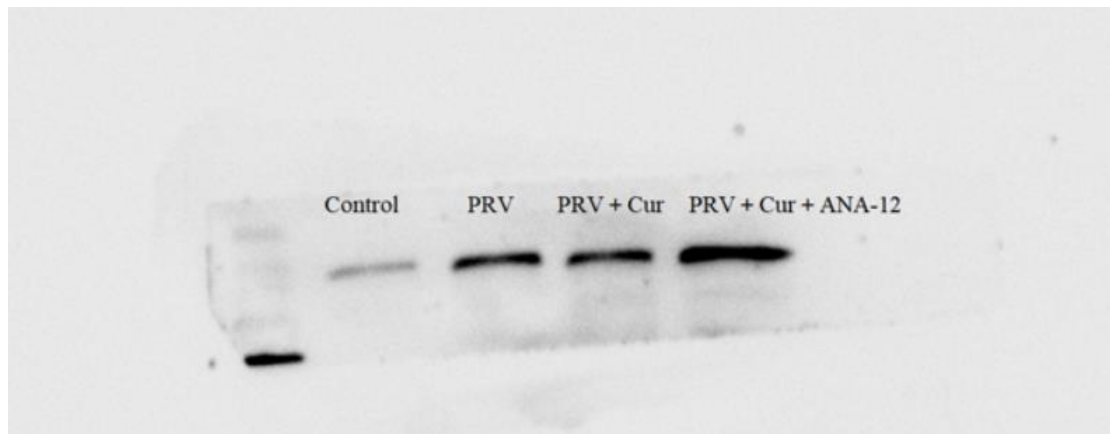

Supplementary figure 7

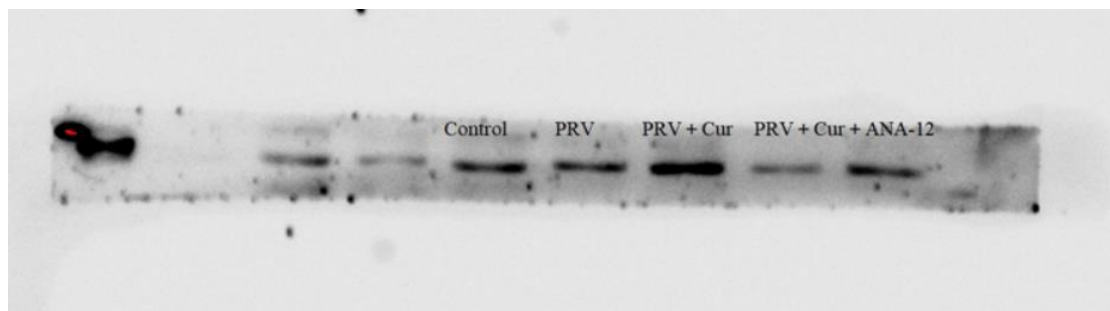

#### Legend

Supplementary figure 1. The original, unprocessed images of  $\beta$ -actin in Figure 3.

Supplementary figure 2. The original, unprocessed images of BDNF in Figure 3.

Supplementary figure 3. The original, unprocessed images of  $\beta$ -actin in Figure 5.

Supplementary figure 4. The original, unprocessed images of BCL-2 in Figure 5.

Supplementary figure 5. The original, unprocessed images of BAX in Figure 5.

Supplementary figure 6. The original, unprocessed images of nNOS in Figure 5.

Supplementary figure 7. The original, unprocessed images of TrkB in Figure 5.
